# Supplementary material for: The Coastal El Niño Event of 2017 in Ecuador and Peru: A Weather Radar Analysis
Source: MDPI journal article supplement (doi:10.3390/rs14040824), 2022-02-10
Supplement: s1 [file s1]

Archive with 3 entries (3 files):
- remotesensing-1571749.pdf
- Video S1.avi
- Video S2.avi
