# Supplementary material for: The Coastal El Niño Event of 2017 in Ecuador and Peru: A Weather Radar Analysis
Source: MDPI journal article supplement (doi:10.3390/rs14040824), 2022-02-10
Supplement: s1 [file s1 › remotesensing-1571749.pdf]

# Supplementary Material

## The Coastal El Niño-Event of 2017 in Ecuador and Peru - A Weather Radar Analysis

Rütger Rollenbeck, Johanna Orellana-Alvear, Jörg Bendix, Rodolfo Rodriguez, Franz Pucha-Cofrep,  
Mario Gualpa, Andreas Fries, Rolando Celleri

### S1: Radar image time series 2<sup>nd</sup> and 3<sup>rd</sup> of March 2017

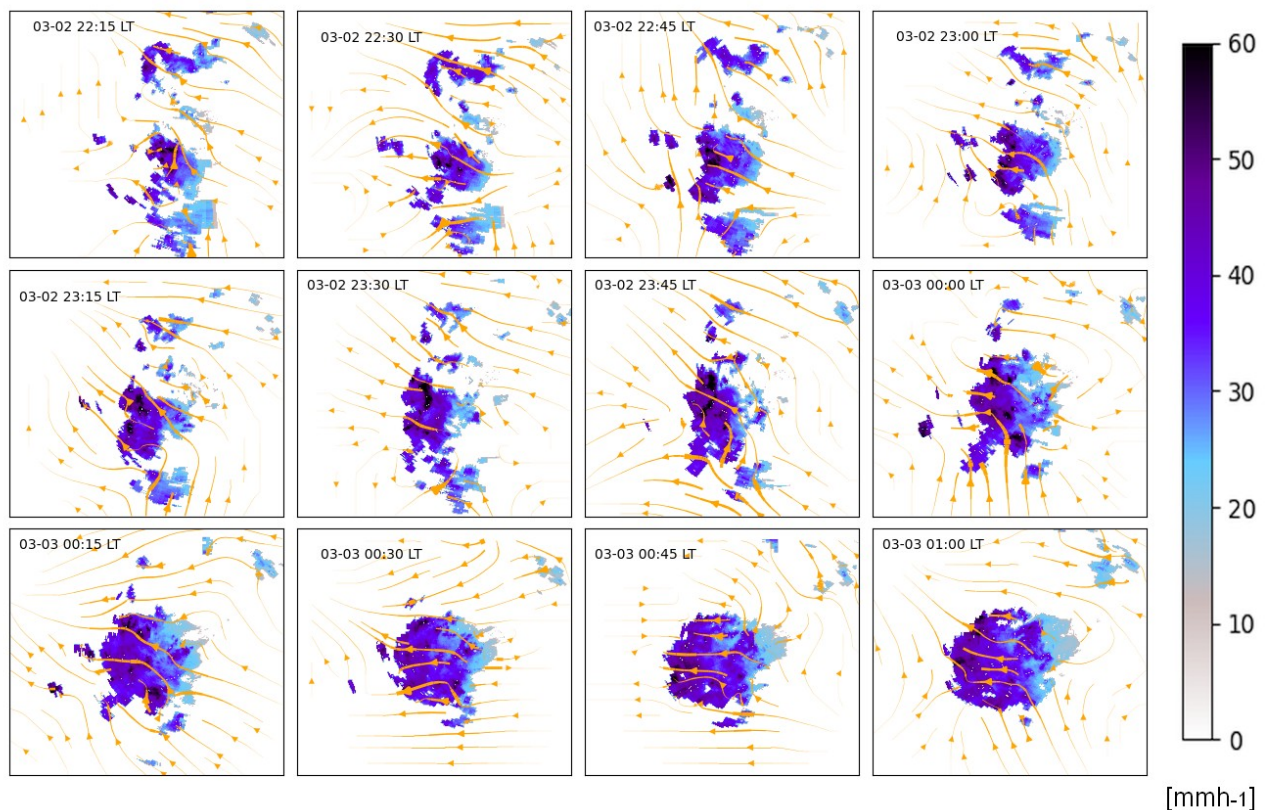

Figure S1: Image time series (15-minute step) of the storm development during the night of 2<sup>nd</sup> and 3<sup>rd</sup> of March 2017 showing the transition from isolated showers to a mesoscale cloud cluster.

### Video S1: 2Mar.avi

The animated time series shows the full 5-minute sequence from 1<sup>st</sup> of March 19:10 local time to 4<sup>th</sup> of March 18:45

## S2: Radar image time series 7<sup>th</sup> of March 2017

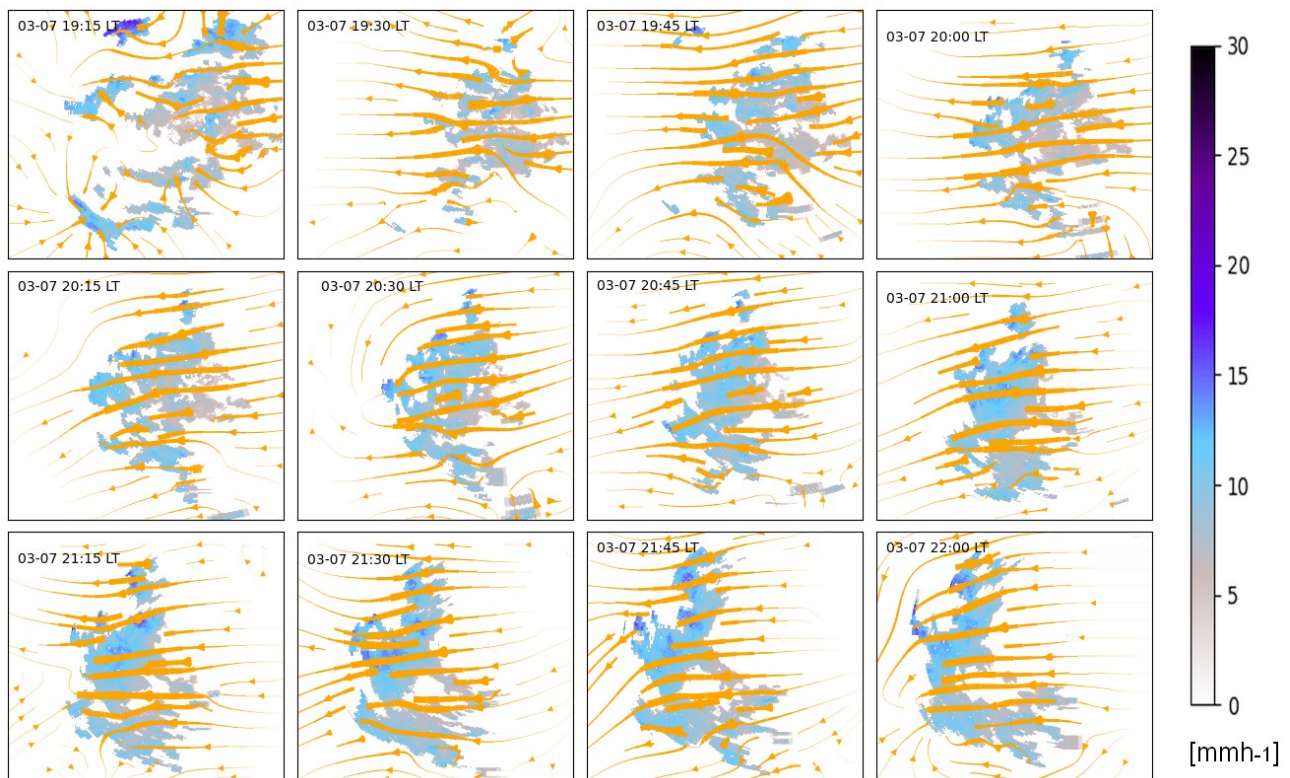

Figure S2: Image time series (15-minute step) of the storm development during the night of 7<sup>th</sup> of March 2017 showing the development of the bow-like storm cell. Please note: Colorscale is different to Fig. S1.

### Video S2: 7Mar.avi

The animated time series shows the full 5-minute sequence from 6<sup>th</sup> of March 19:10 local time to 8<sup>th</sup> of March 18:45

### S3: 850- and 500 hPa zonal wind component 21.2.2017 – 10.4.2017

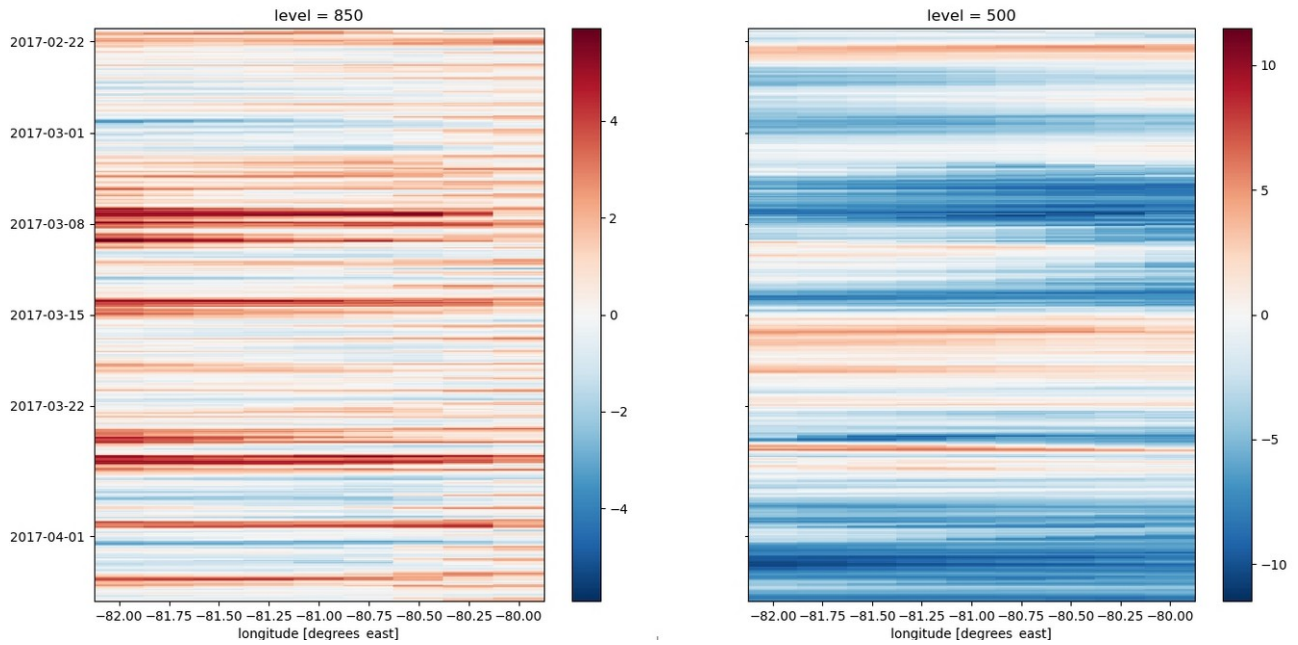

Figure S3: Longitude-time-plots of zonal wind speed at the 850- and 500 hPa-level as mean vector for the full radar domain. The dominant red colors at 850 hPa indicate westerly wind, while the blue colors at 500 hPa show the prevailing tropical easterlies at higher tropospheric levels.
